# Supplementary material for: Climate Change and Children’s Mental Health: A Developmental Perspective
Source: PubMed Central journal article supplement (PMC9280699; doi:10.1177/21677026211040787), 2021-09-14
Supplement: sj-pdf-1-cpx-10.1177_21677026211040787.pdf [file sj-pdf-1-cpx-10.1177_21677026211040787.pdf]

## **Climate change and children's mental health – A developmental perspective**

Francis Vergunst, DPhil and Helen L Berry, PhD

University of Montreal, Montreal, Quebec, Canada (Vergunst)

Australian Institute of Health Innovation, Macquarie University, Sydney, Australia (Berry)

Correspondence to Francis Vergunst ([francis.vergunst@umontreal.ca](mailto:francis.vergunst@umontreal.ca)) Ste-Justine Hospital Research Center, 3175, Côte Sainte-Catherine, Étage A, Local A-568, Montréal (Québec) Canada, H3T 1C5. Tel: 1-514 345-2182, Fax: 514 345-2176

**TABLE S1:** Exposure to severe weather events and its impact on psychological health and wellbeing

| Item                                                                                                                                                                                                                                                                                                                                                                                                                                                                                                                                                                                               | Scoring                                                                                                                                                                                                                                                                                                                                                                                                                                                                                    | Derivation                                                                                                                                                                                                                                                                                                                                                                                                                                                                                                                                              |
|----------------------------------------------------------------------------------------------------------------------------------------------------------------------------------------------------------------------------------------------------------------------------------------------------------------------------------------------------------------------------------------------------------------------------------------------------------------------------------------------------------------------------------------------------------------------------------------------------|--------------------------------------------------------------------------------------------------------------------------------------------------------------------------------------------------------------------------------------------------------------------------------------------------------------------------------------------------------------------------------------------------------------------------------------------------------------------------------------------|---------------------------------------------------------------------------------------------------------------------------------------------------------------------------------------------------------------------------------------------------------------------------------------------------------------------------------------------------------------------------------------------------------------------------------------------------------------------------------------------------------------------------------------------------------|
| <p>“Were you affected in any way by a weather-related disaster (e.g., flood, wildfire, storm, cyclone) in the past 12 months?”</p>                                                                                                                                                                                                                                                                                                                                                                                                                                                                 | <p>Response on a scale of 1 to 10, where 1 is not at all and 10 is very severely</p>                                                                                                                                                                                                                                                                                                                                                                                                       | <p>Berry, Adapted from the HILDA survey and O’Donnell (2008)</p>                                                                                                                                                                                                                                                                                                                                                                                                                                                                                        |
| <p>“In the last 12 months, did a weather-related disaster (e.g., flood, wildfire, storm, cyclone) severely damage or destroy:</p> <p>(a) your home?<br/>           (b) your suburb or local area?<br/>           (c) the home of a family member or friend?</p>                                                                                                                                                                                                                                                                                                                                    | <p>For each item endorsed, ask:</p> <ul style="list-style-type: none"> <li>On a scale of 1 to 10, where 1 is not at all and 10 is very severely, how badly were you affected by [your suburb etc] being flooded?</li> </ul>                                                                                                                                                                                                                                                                | <p>Berry, Adapted from O’Donnell (2008)</p>                                                                                                                                                                                                                                                                                                                                                                                                                                                                                                             |
| <p>“Did any of the following happen as a result of this weather-related disaster?”</p> <p>YES NO</p> <p>(a) You are worried about how you will manage<br/>           (b) You thought you might be badly injured or even die<br/>           (c) You personally knew people who were killed or badly injured<br/>           (d) You felt terrified, helpless or hopeless<br/>           (e) You had to move out of your home (even briefly)<br/>           (f) You are still <u>currently</u> distressed about it<br/>           (g) You received professional help or support for your distress</p> | <p>If item (a) endorsed, ask:</p> <ul style="list-style-type: none"> <li>How often are you worried about how you will manage?<br/>               5-point scale ranging from 1= ‘none of the time’ to 5= ‘all of the time’</li> </ul> <p>If item (f) endorsed, ask:</p> <ul style="list-style-type: none"> <li>How often do you currently have distressing thoughts about the event?<br/>               5-point scale ranging from 1= ‘none of the time’ to 5= ‘all of the time’</li> </ul> | <p>Berry, Adapted from O’Donnell (2008)</p> <p>“You felt terrified, helpless or hopeless” (Consistent with diagnostic criteria (A2) for PTSD (DSMIV) and ICD entry criteria).</p> <p>“You are still currently distressed about it” (Allows calculation of point prevalence of post-disaster distress and differentiation from other possible causes of anxiety; can be validated against related constructs measured in the cohort. This item provides insight into whether the validated anxiety item is directly related to the traumatic event).</p> |
| <p>“Were you or a close family member admitted to hospital due to injuries caused by the severe weather event?”</p>                                                                                                                                                                                                                                                                                                                                                                                                                                                                                | <p>Yes – you=2, family=1, no=0</p>                                                                                                                                                                                                                                                                                                                                                                                                                                                         | <p>Berry, Adapted from O’Donnell (2008)</p>                                                                                                                                                                                                                                                                                                                                                                                                                                                                                                             |
